# Supplementary material
Source: PubMed Central journal article supplement (PMC7263382)
Supplement: NIHMS1532039-supplement-2.pdf [file NIHMS1532039-supplement-2.pdf]

# Supplementary Figures and Tables for CALDER: Inferring phylogenetic trees from longitudinal tumor samples

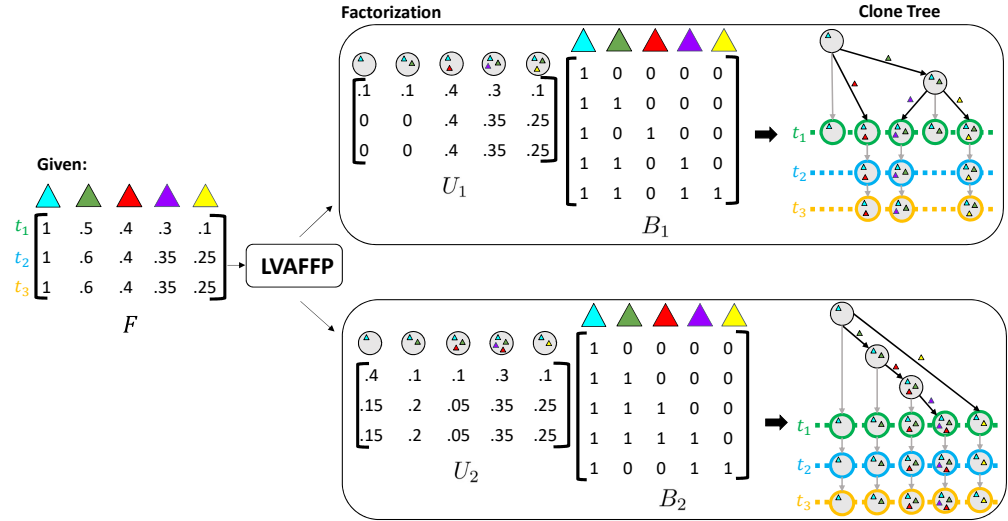

Figure S1: **Some LVAFFP solutions are trivially longitudinal, related to Figure 1.** An example of a frequency matrix  $F$  and two factorizations  $F = U_1 B_1$  and  $F = U_2 B_2$  that both correspond to longitudinally-observed clone trees. While  $U_1$  (top) has some 0 entries,  $U_2$  (bottom) does not, and thus is trivially longitudinal, with all clones present at all times.

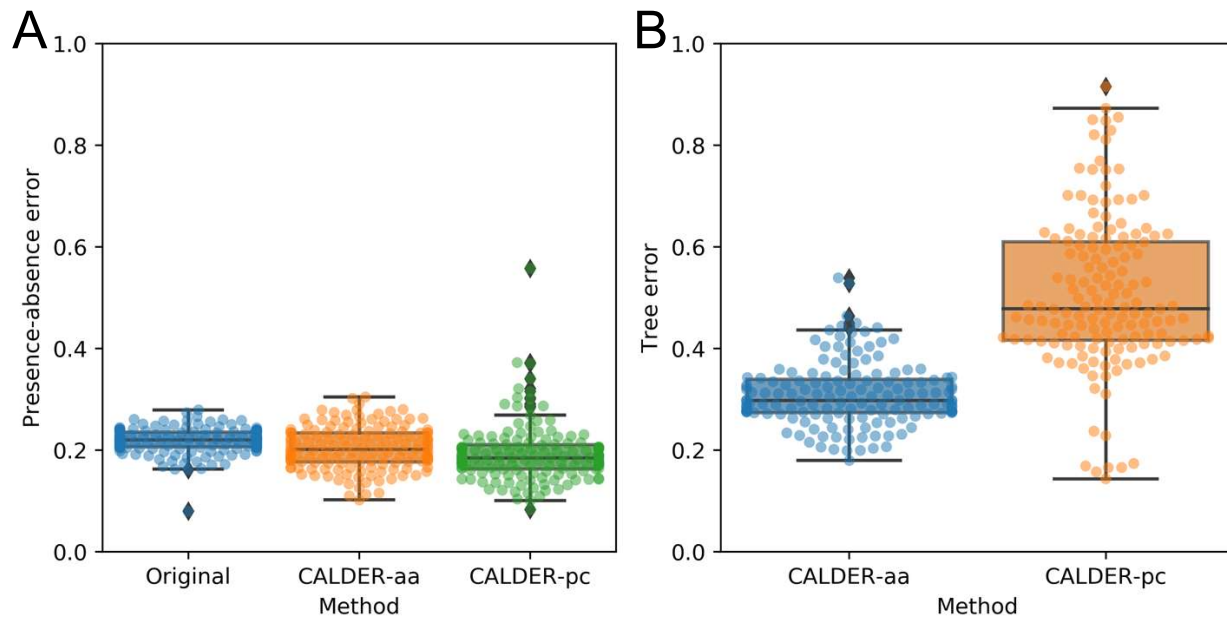

Figure S2: **Comparison of absence-aware (aa) and absence-naive PyClone (pc) clustering on simulated tumors, related to Figure 2 and STAR Methods.** CALDER-aa and CALDER-pc are the results from running CALDER on the clustered data from our absence-aware clustering method and PyClone (Roth et al., 2014), respectively. Original shows the presence-absence error between the input matrices of longitudinal samples and the ground truth. The y-axes are (A) presence-absence error and (B) tree error as described in Results.

|                   | Average |          |       | Total     |          |           |
|-------------------|---------|----------|-------|-----------|----------|-----------|
|                   | CALDER  | PhyloWGS | CITUP | CALDER    | PhyloWGS | CITUP     |
| Wall time (min)   | 1.61    | 862      | 477   | 287       | 153427   | 84819     |
| User time (min)   | 342     | 3024     | 189   | 60789     | 538300   | 33719     |
| System time (min) | 29      | 38       | 474   | 5115      | 6846     | 84437     |
| Memory (MB)       | 502     | 51       | 122   | 504 (max) | 55 (max) | 127 (max) |

Table S1: **Running time and space requirements for CALDER, PhyloWGS, and CITUP on simulated data, related to STAR Methods.**
